# Supplementary material for: A 1T-WS2 “electron pump” regulates charge transfer over ZnCdS/NiV-LDH p–n heterostructures for enhanced photocatalytic hydrogen evolution
Source: Royal Society of Chemistry journal article supplement (doi:10.1039/d3nr03391k), 2023-01-01
Supplement: d3nr03391k1.pdf [file d3nr03391k1.pdf]

## Supporting Information

### 1T-WS<sub>2</sub> “electron pump” regulate charge transfer over ZnCdS/NiV-LDH p-n heterostructures for enhanced photocatalytic hydrogen evolution

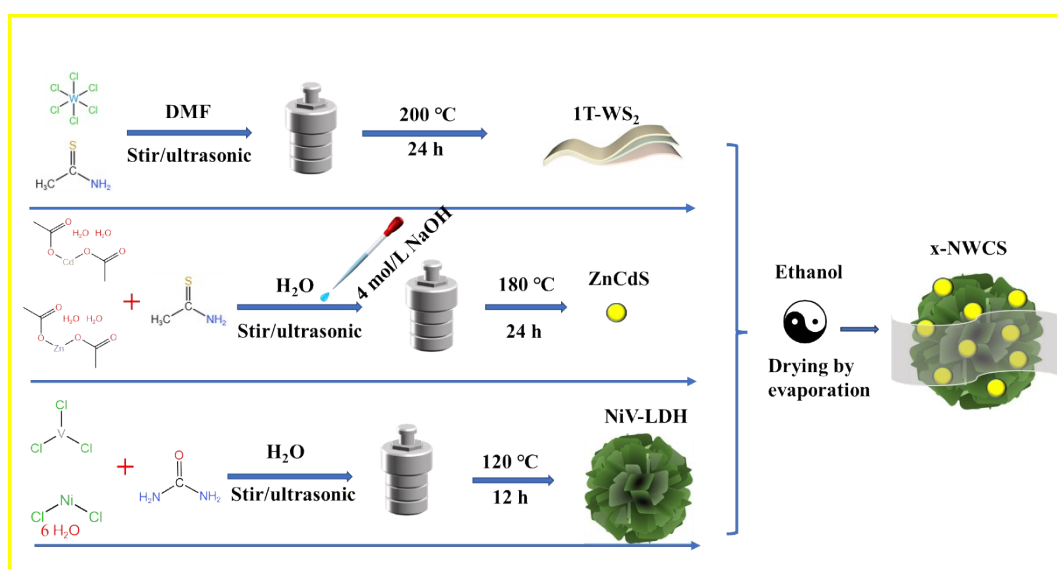

Fig. S1 Compound Catalyst preparation process.

Table S1. The  $S_{\text{BET}}$ , pore volume and pore diameter distribution for each catalyst.

| Samples            | $S_{\text{BET}}$ ( $\text{m}^2 \cdot \text{g}^{-1}$ ) | Pore volume ( $\text{cm}^3 \cdot \text{g}^{-1}$ ) | Average pore size (nm) |
|--------------------|-------------------------------------------------------|---------------------------------------------------|------------------------|
| ZnCdS              | 7.35                                                  | 0.09                                              | 49.38                  |
| 1T-WS <sub>2</sub> | 5.02                                                  | 0.02                                              | 20.13                  |
| NiV-LDH            | 65.69                                                 | 0.53                                              | 32.20                  |
| 10-WCS             | 8.79                                                  | 0.06                                              | 27.69                  |
| 20-NWCS            | 10.56                                                 | 0.13                                              | 47.52                  |

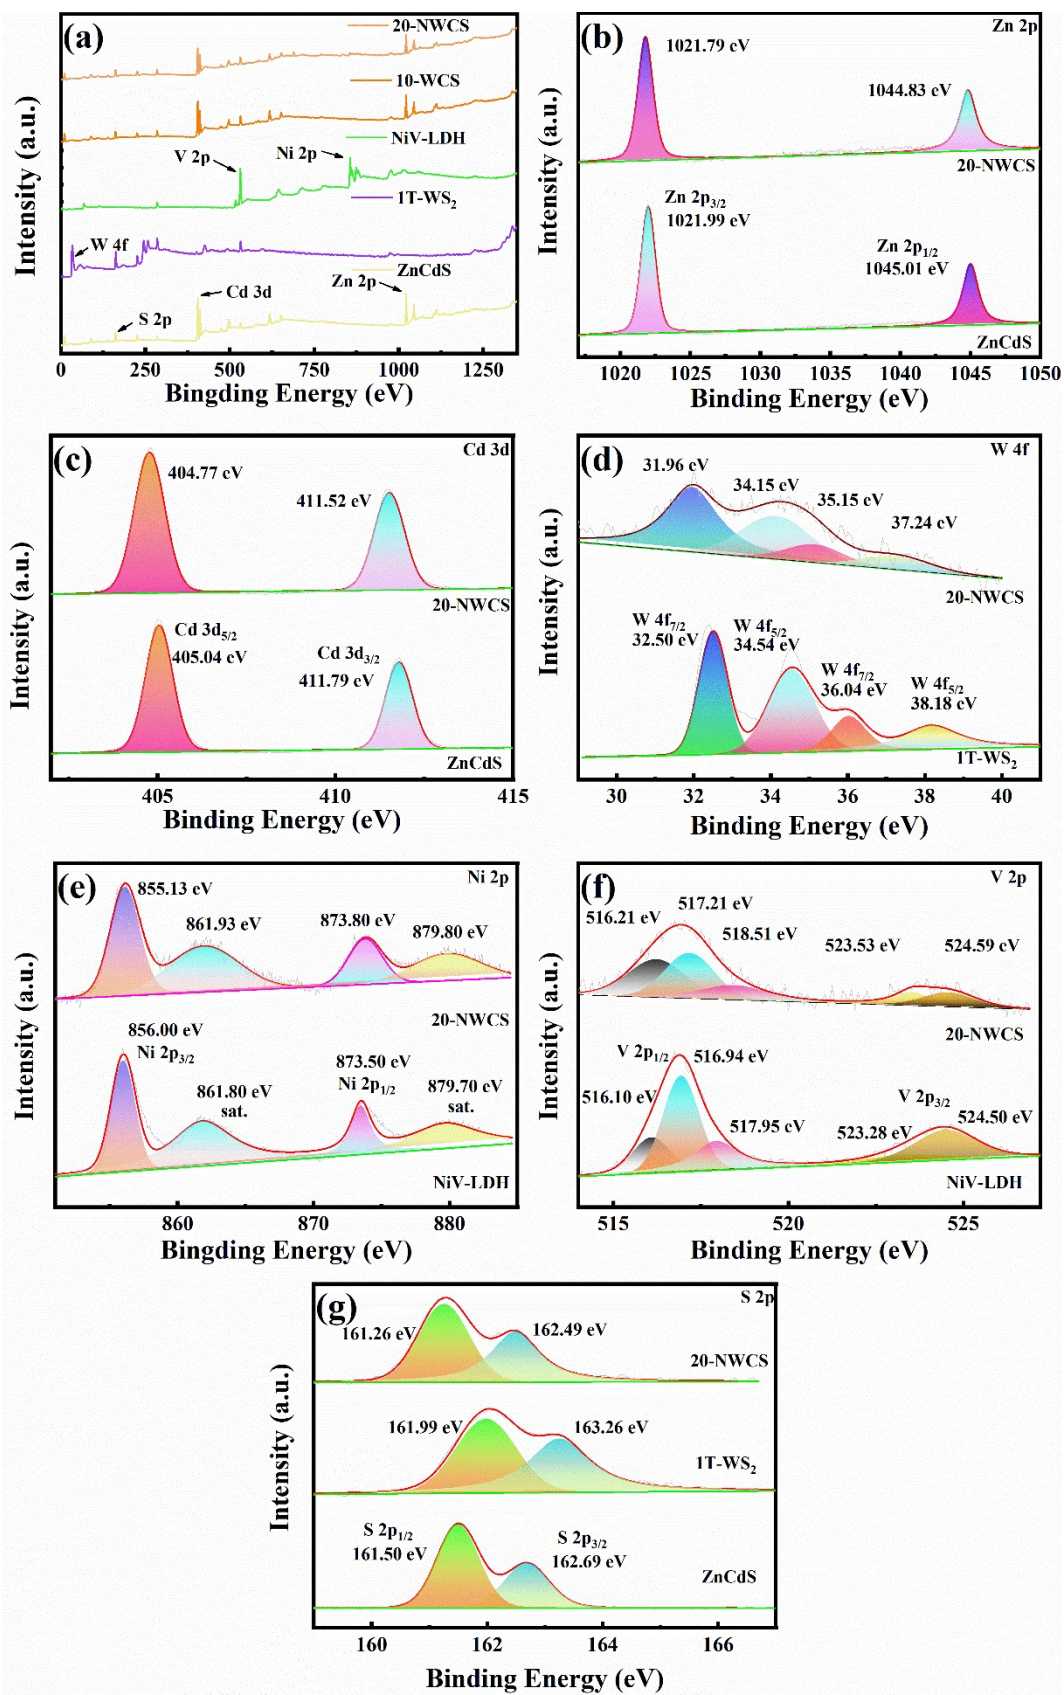

Fig. S2 XPS of (a) full spectrum; (b) Zn 2p; (c) Cd 3d; (d) W 4f; (e) Ni 2p; (f) V 2p and (g) S 2p.

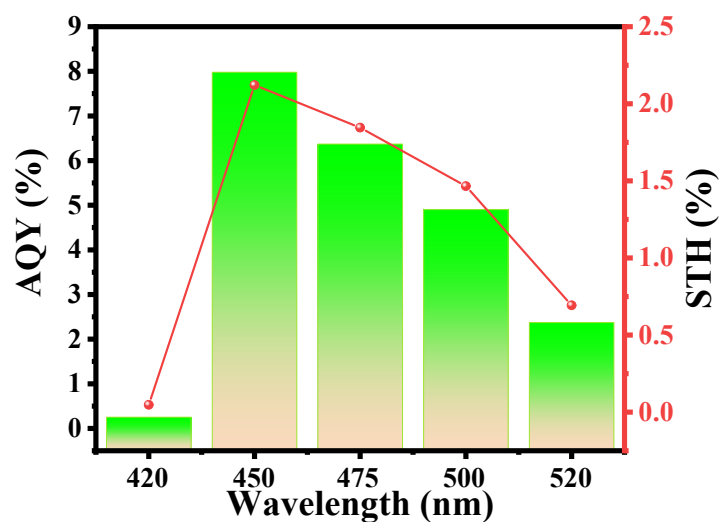

Fig. S3 AQE testing and STH conversion efficiency of 20-NWCs.

Table S2 Comparison of ZnCdS based composite materials for photocatalytic hydrogen evolution.

| Photocatalyst                            | Light Source  | Sacrificial agents                                | Production rate                             | AQE                 | Refs |
|------------------------------------------|---------------|---------------------------------------------------|---------------------------------------------|---------------------|------|
|                                          |               |                                                   |                                             | (%)/n<br>m          |      |
| ZnCdS/1T-WS <sub>2</sub> /NiV-LDH        | 5 W LED       | Lactic acid                                       | 22.37 mmol·g <sup>-1</sup> ·h <sup>-1</sup> | 7.98<br>(450)       | This |
| ZnCdS/NiCoP                              | 5 W LED       | Lactic acid                                       | 11.64 mmol·g <sup>-1</sup> ·h <sup>-1</sup> | 7.93<br>(450)       | [1]  |
| ZnCdS/P-graphdiyne                       | 5 W LED       | Lactic acid                                       | 10.39 mmol·g <sup>-1</sup> ·h <sup>-1</sup> | 3.35<br>(420)       | [2]  |
| ZnCdS/Ce-MOF                             | 300 W Xe lamp | Na <sub>2</sub> S/Na <sub>2</sub> SO <sub>3</sub> | 3.95 mmol·g <sup>-1</sup> ·h <sup>-1</sup>  | No                  | [3]  |
| ZnCdS/Co <sub>3</sub> P                  | 5 W LED       | Na <sub>2</sub> S/Na <sub>2</sub> SO <sub>3</sub> | 17.76 mmol·g <sup>-1</sup> ·h <sup>-1</sup> | No                  | [4]  |
| ZnCdS/CuS/Cu <sub>9</sub> S <sub>5</sub> | 5 W LED       | Na <sub>2</sub> S/Na <sub>2</sub> SO <sub>3</sub> | 13.82 mmol·g <sup>-1</sup> ·h <sup>-1</sup> | 8.87<br>(475)       | [5]  |
| ZnCdS/Ni <sub>3</sub> C                  | 300 W Xe lamp | Na <sub>2</sub> S/Na <sub>2</sub> SO <sub>3</sub> | 3.31 mmol·g <sup>-1</sup> ·h <sup>-1</sup>  | No                  | [6]  |
| ZnCdS/NiB                                | LED           | Lactic acid                                       | 7.70 mmol·g <sup>-1</sup> ·h <sup>-1</sup>  | 13.3<br>(not found) | [7]  |
| ZnCdS/In <sub>2</sub> O <sub>3</sub>     | 300 W Xe lamp | Na <sub>2</sub> S/Na <sub>2</sub> SO <sub>3</sub> | 1.1 mmol·g <sup>-1</sup> ·h <sup>-1</sup>   | 0.32                | [8]  |

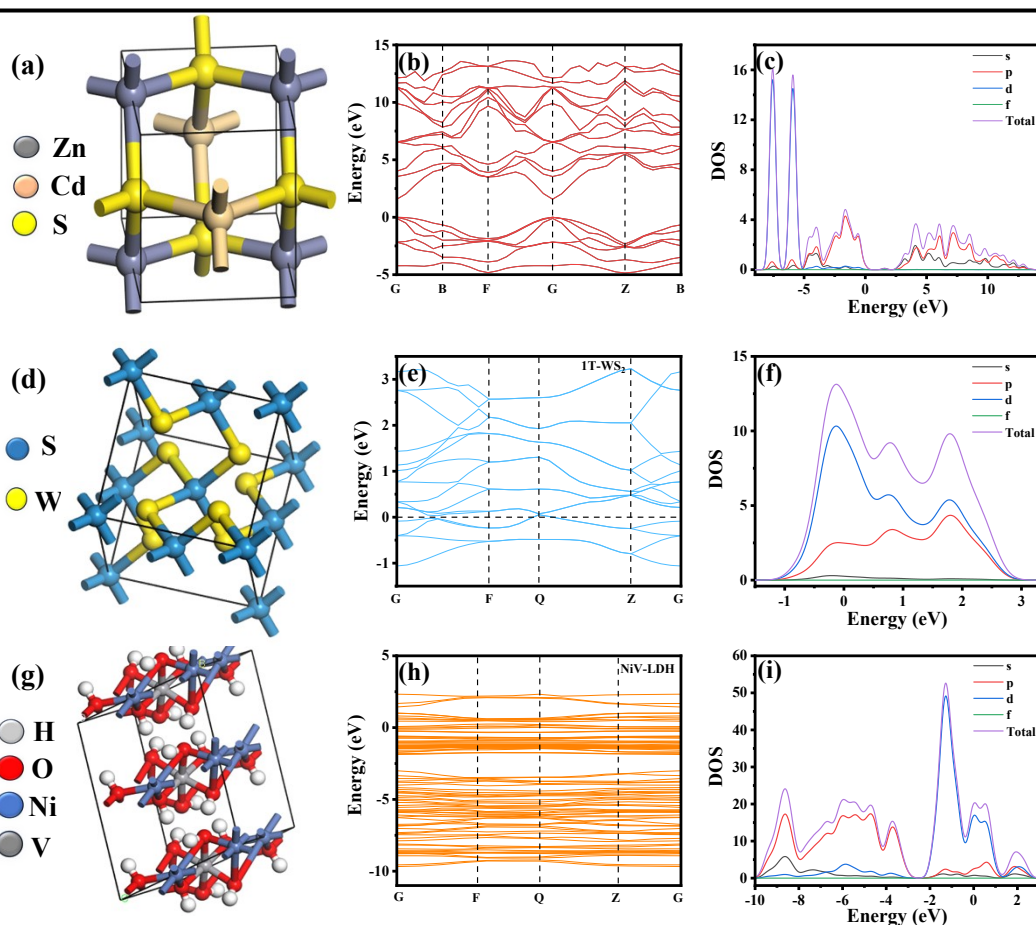

**Fig. S4** Rhythm optimization model of (a) ZnCdS; (d) 1T-WS<sub>2</sub>; (g) NiV-LDH; band structure of (b) ZnCdS; (e) 1T-WS<sub>2</sub>; (h) NiV-LDH; DOS and PDOS of (c) ZnCdS; (f) 1T-WS<sub>2</sub>; (i) NiV-LDH.

## References

- [1] Wang K, Xie H, Li Y, Wang G, Jin Z, Anchoring highly-dispersed ZnCdS nanoparticles on NiCo Prussian blue Analogue-derived cubic-like NiCoP forms an S-scheme heterojunction for improved hydrogen evolution, *Journal of Colloid and Interface Science*. 2022, 628, 64-78.
- [2] Liu Y, Ma X, Jiang X, Jin Z, Phosphorus-modified two-dimensional graphdiyne (C<sub>n</sub>H<sub>2n-2</sub>)/ZnCdS forms S-scheme heterojunctions for photocatalytic hydrogen production, *Nanoscale*. 2022, 14(33), 12077-12089.
- [3] Wang Y, Jin H, Li Y, Fang J, Chen C, Ce-based organic framework enhanced the hydrogen evolution ability of ZnCdS photocatalyst, *International Journal of Hydrogen Energy*. 2022, 47(2),

962-970.

[4] Li S, Wang K, Wang G, Xie H, Jin Z, An atomic-level charge transfer channels constructed with special Co-S bond and PS bond in ZnCdS/CoSP S-scheme heterojunction for hydrogen evolution, *Colloids and Surfaces A: Physicochemical and Engineering Aspects*. 2023, 656, 130335.

[5] Xie H, Wang K, Li S, Wang G, Jin Z, A novel 3D floral spherical composites with double p-n heterojunctions for enhanced photocatalytic hydrogen production under visible light, *Journal of Alloys and Compounds*. 2022, 928, 167078.

[6] Luo Z, Zhao X, Zhang H, Jiang Y,  $Zn_{0.3}Cd_{0.7}S$  nanorods loaded with noble-metal-free  $Ni_3C$  co-catalyst enhancing photocatalytic hydrogen evolution, *Applied Catalysis A: General*. 2019, 582, 117115.

[7] Song L, Zhang S, Liu D, Sun S, Wei J, High-performance hydrogen evolution of NiB/ZnCdS under visible light irradiation, *International Journal of Hydrogen Energy*. 2020, 45(15), 8234-8242.

[8] Yang H, Tang J, Luo Y, Zhan X, Liang Z, Jiang L, Hou H, Yang W, MOFs - Derived Fusiform  $In_2O_3$  Mesoporous Nanorods Anchored with Ultrafine CdZnS Nanoparticles for Boosting Visible-Light Photocatalytic Hydrogen Evolution, *Small*. 2021, 17(36), 2102307.
